# Supplementary material for: Transcriptomic profiling provides molecular insights into hydrogen peroxide-induced adventitious rooting in mung bean seedlings
Source: PubMed Central journal article supplement (PMC5316208; doi:10.1186/s12864-017-3576-y), 2017-02-17
Supplement: 12864_2017_3576_MOESM10_ESM.pdf [file 12864_2017_3576_MOESM10_ESM.pdf]

Additional file 10 List of the genes selected for q-PCR validation

| Gene ID | Functional description                             | Swissprot ID | Bitscore | E-value | RPKM     |          |          |
|---------|----------------------------------------------------|--------------|----------|---------|----------|----------|----------|
|         |                                                    |              |          |         | Con      | Wat6     | Wat24    |
| Vr37254 | Auxin response factor 2, ARF2                      | sp Q94JM3    | 952      | 0       | 89.852   | 37.954   | 50.760   |
| Vr35374 | Auxin response factor 18, ARF18                    | sp Q653H7    | 816      | 0       | 26.952   | 16.698   | 14.999   |
| Vr35831 | Auxin response factor 1, ARF1                      | sp Q8L7G0    | 885      | 0       | 29.128   | 15.349   | 16.768   |
| Vr29470 | Auxin response factor 3, ARF3                      | sp O23661    | 450      | 1E-142  | 32.138   | 10.622   | 12.376   |
| Vr13756 | Auxin response factor 6, ARF6                      | sp Q9ZTX8    | 376      | 2E-114  | 40.028   | 15.658   | 13.549   |
| Vr36957 | Auxin response factor 19, ARF19                    | sp Q8RYC8    | 734      | 0       | 57.040   | 24.402   | 29.694   |
| Vr24483 | Auxin response factor 8, ARF8                      | sp Q9FGV1    | 278      | 3E-82   | 13.053   | 8.386    | 8.696    |
| Vr23260 | Auxin transporter-like protein 4                   | sp Q8L884    | 851      | 0       | 159.520  | 73.881   | 49.185   |
| Vr34322 | LOB domain-containing protein 41, LBD41            | sp Q9M886    | 185      | 3E-53   | 55.243   | 121.677  | 134.119  |
| Vr39013 | LOB domain-containing protein 21, LBD21            | sp Q9SRL8    | 188      | 1E-54   | 94.987   | 84.197   | 46.743   |
| Vr40540 | LOB domain-containing protein 29, LBD29            | sp Q9M2J7    | 186      | 3E-54   | 3.714    | 26.745   | 12.554   |
| Vr38129 | Sodium/hydrogen exchanger 2, NHX2                  | sp Q56XP4    | 333      | 5E-103  | 381.908  | 429.401  | 472.443  |
| Vr40252 | NAC domain-containing protein 72, NAC72            | sp Q93VY3    | 350      | 2E-114  | 73.946   | 21.275   | 61.914   |
| Vr44893 | NAC domain-containing protein, NAC1                | sp Q84TE6    | 339      | 5E-112  | 24.715   | 17.499   | 19.606   |
| Vr56348 | NAC transcription factor, NAC2                     | sp Q8GY42    | 303      | 3E-97   | 7.724    | 1.993    | 6.702    |
| Vr34452 | NAC transcription factor NAM-B2, NAMB2             | sp A0SPJ6    | 188      | 9E-53   | 105.389  | 35.786   | 100.297  |
| Vr32636 | Auxin-responsive protein IAA9, IAA9                | sp Q38827    | 404      | 8E-132  | 167.645  | 180.603  | 152.081  |
| Vr13386 | Auxin-responsive protein IAA26, IAA26              | sp Q8LAL2    | 227      | 9E-67   | 95.846   | 129.343  | 104.800  |
| Vr32189 | Auxin-responsive protein IAA14, IAA14              | sp Q38832    | 337      | 7E-111  | 630.691  | 551.345  | 220.222  |
| Vr13709 | Auxin-responsive protein IAA8, IAA8                | sp Q38826    | 207      | 1E-58   | 112.586  | 79.588   | 82.916   |
| Vr38087 | Alcohol dehydrogenase 1, ADH1                      | sp P13603    | 618      | 0       | 7170.197 | 7091.752 | 3678.503 |
| Vr13399 | Alcohol dehydrogenase, ADH                         | sp P13603    | 307      | 5E-101  | 52.076   | 202.286  | 151.123  |
| Vr33063 | Histidine kinase 1, AHK1                           | sp Q9SXL4    | 847      | 0       | 28.731   | 1.089    | 5.825    |
| Vr33358 | Histidine kinase 2, AHK2                           | sp Q9C5U2    | 1275     | 0       | 20.795   | 12.318   | 11.801   |
| Vr40153 | Histidine kinase 3, AHK3                           | sp Q9C5U1    | 1351     | 0       | 49.501   | 35.556   | 34.619   |
| Vr38180 | Dehydration-responsive protein RD22, RD22          | sp Q08298    | 310      | 2E-99   | 1249.984 | 356.157  | 738.560  |
| Vr34639 | Auxin-induced protein 22E, AUX22E                  | sp O24543    | 379      | 8E-129  | 52.651   | 50.996   | 26.642   |
| Vr31234 | Auxin-induced protein 22B, AUX22B                  | sp P32294    | 279      | 3E-88   | 58.082   | 58.968   | 37.863   |
| Vr39198 | Auxin-induced protein 22C, AUX22C                  | sp O24541    | 268      | 5E-89   | 6.366    | 43.768   | 4.778    |
| Vr47043 | Auxin-induced protein 15A, AUX15A                  | sp P33081    | 85.9     | 8E-20   | 1.261    | 39.716   | 2.638    |
| Vr22610 | Cationic peroxidase 1, PER1                        | sp P22195    | 324      | 2E-107  | 0.193    | 139.508  | 372.845  |
| Vr21159 | Auxin efflux carrier component 1, PIN1             | sp Q9C6B8    | 464      | 2E-156  | 0.317    | 15.078   | 10.054   |
| Vr39799 | MYB transcription factor MYB134                    | sp Q6R0H1    | 122      | 2E-28   | 249.382  | 5.232    | 112.908  |
| Vr40489 | MYB transcription factor MYB114                    | sp Q6R0H1    | 118      | 5E-28   | 223.864  | 4.108    | 94.885   |
| Vr31128 | Cationic peroxidase 2, PER2                        | sp P22196    | 485      | 1E-168  | 4.195    | 169.179  | 226.783  |
| Vr36822 | Quinone oxidoreductase-like protein, QORL          | sp Q9ZUC1    | 378      | 1E-124  | 7.085    | 40.927   | 4.776    |
| Vr39707 | Peptidyl-prolyl cis-trans isomerase CYP20, CYP20   | sp Q9ASS6    | 289      | 9E-94   | 58.173   | 62.356   | 58.411   |
| Vr38164 | Eukaryotic translation initiation factor 5A, eIF5A | sp Q9AXJ4    | 313      | 4E-105  | 606.853  | 602.711  | 602.154  |
| Vr31451 | Actin-related protein 4, ACTIN                     | sp Q84M92    | 712      | 0       | 18.727   | 19.322   | 20.725   |

Primers for q-PCR verification

Vr39707 F: 5' TCCCCAACAGCCGAAAA 3' 59.5  
Vr39707 R: 5' CCCCTTGAATCATGAAATCCTT 3' 59.9 107bp  
Vr38164 F: 5' ACCTTAGGCTTCCAACCGAT 3' 58.0  
Vr38164 R: 5' CTCCCATTGCAGACATAACAGA 3' 57.8 99bp  
Vr31451 F: 5' CGTGTTTCCTTCTGTTGTTGG 3' 58.1  
Vr31451 R: 5' CCTCTTCCCTTAGCCTTGTC 3' 57.7 142bp  
Vr37254 F: 5' ATCTCTCATCCGCAACACTCCT 3' 60.3  
Vr37254 R: 5' TTCACCCCACTTCTCTTACCTC 3' 61.4 123bp  
Vr35374 F: 5' ACCTTGTCGCTGTCTTCGTGG 3' 62.4  
Vr35374 R: 5' GTGGCGGCTGTAAATTCCTC 3' 61.4 110bp  
Vr35831 F: 5' CCGCAGCCAACACAAAGAAAC 3' 63  
Vr35831 R: 5' GGTGATGGATAGAGGCCACGTC 3' 63.1 155bp  
Vr29470 F: 5' CTTGTTCTAAGTGCCCTTGTGG 3' 59.3  
Vr29470 R: 5' GCTTGCCTTTCGCTTTCCT 3' 61.3 175bp  
Vr13756 F: 5' AAGGTTGGCTGGGATGAAT 3' 58.7  
Vr13756 R: 5' TAAGGGGAAATGGAGATGGAT 3' 57.1 109bp  
Vr36957 F: 5' GCTGGCTATTCTGCTGTACCTG 3' 59.5  
Vr36957 R: 5' TCCCTTACTATTGGAGTCGGC 3' 58.7 96bp  
Vr24483 F: 5' TTGAGGGAAAAGTTGGAAGACC 3' 58.3  
Vr24483 R: 5' CCTGAACCTAGAGCAAGGGATT 3' 59.5 196bp  
Vr23260 F: 5' ACTCCAACGCCTTCTCTCCTC 3' 63.1  
Vr23260 R: 5' ATCCCAATCACCTTCTCCACA 3' 62.9 136bp  
Vr34322 F: 5' CAATGGATAAGTTGCCCTCAC 3' 57.2  
Vr34322 R: 5' ACCGCTGGTTGGAGATGG 3' 58.5 119bp  
Vr39013 F: 5' CAAGGCTCAGAGACCCCG 3' 58.4  
Vr39013 R: 5' TAGCAGCAGCGTGACATCG 3' 58.8 126bp  
Vr40540 F: 5' ATCTCAGGGAACAGGCAGGTC 3' 60.4  
Vr40540 R: 5' TCCGTCTGGAACCAACTCTGA 3' 60.2 121bp  
Vr38129 F: 5' CTGAACTGCGAACCAATGC 3' 57.1  
Vr38129 R: 5' TTCTTGCCTTAGGAGGTGG 3' 58.0 136bp  
Vr40252 F: 5' AGACCCTCTTGCCAGTTG 3' 57.1  
Vr40252 R: 5' CCGAAAATCGCCTTGCTT 3' 58.7 180bp  
Vr44893 F: 5' AGGGTTCAGGTTCCATCAA 3' 59.0  
Vr44893 R: 5' GAATATCCCAAGGTTGCACT 3' 58.5 125bp  
Vr56348 F: 5' ATTCAACCTCAAAACCCCT 3' 57.6  
Vr56348 R: 5' CACAACACCAATCATCAAGC 3' 58.5 76bp  
Vr34452 F: 5' CCGACGAGGAATTGGTTGTG 3' 61.0  
Vr34452 R: 5' GAGCGGTTGCCGTTAGGATA 3' 60.4 181bp  
Vr32636 F: 5' GACTGTAGCGTCTGGTTCTTCG 3' 59.3  
Vr32636 R: 5' CCTCAACTCCGTAGCCTTCAA 3' 61.3 181bp  
Vr13386 F: 5' ACCCCACCAAGAGAAAGGAAG 3' 59.8  
Vr13386 R: 5' CCCACTAAGCGTGCAAATAAAA 3' 60.2 128bp  
Vr32189 F: 5' GTGGAAACACCAAGGGCTACTG 3' 61.2  
Vr32189 R: 5' CCAACCAACCACTTGAGCCT 3' 59.7 171bp

Vr13709 F: 5' TGGGCATAGGAGAGGAGGA 3' 57.5  
 Vr13709 R: 5' GAGAAAGACGGAACGGAGC 3' 57.0 163bp  
 Vr38087 F: 5' AGAATCCGCTGTTTCCTCGT 3' 58.8  
 Vr38087 R: 5' ACAGGTTGCTCTCTCCGATT 3' 58.1 162bp  
 Vr13399 F: 5' AGGCTGGTGAAGTGCGTTT 3' 57.9  
 Vr13399 R: 5' TATGCGAGGAAACAATGGAGT 3' 57.4 101bp  
 Vr33063 F: 5' ACAAGAGCACCCACCCAAAA 3' 60.2  
 Vr33063 R: 5' TGTGTAAATCTTCGTGAAATGCC 3' 59.7 194bp  
 Vr33358 F: 5' GCATCAGGGGGGGTGTTTG 3' 62.9  
 Vr33358 R: 5' GCCTCAGCACGGCTTTTCAG 3' 63.2 125bp  
 Vr40153 F: 5' CAAATCGTCTGGGGGTATCC 3' 60.8  
 Vr40153 R: 5' GAAGCAGTTTCTCCACCAATGAC 3' 60.5 144bp  
 Vr38180 F: 5' CCCGAGTCAGAGGAGGCTAA 3' 59.3  
 Vr38180 R: 5' CCCGTTTCTTTGTCAACTTCT 3' 60.2 177bp  
 Vr34639 F: 5' AACTCTGATTCTTCGACTCCACAAC 3' 64.3  
 Vr34639 R: 5' TCGCCCTGCTCCACCTTTTT 3' 64.3 143bp  
 Vr31234 F: 5' GCTCCAGGAACAGAAGAAA 3' 56.8  
 Vr31234 R: 5' ATAAATCCCAGACCCTCAT 3' 56.1 199bp  
 Vr39198 F: 5' TGGCCTCCGTTTGCTCTA 3' 65.1  
 Vr39198 R: 5' CCGCATCCTTCAACGCTTCG 3' 66.1 193bp  
 Vr47043 F: 5' TCAAGTTTTGGCAAGAAGCA 3' 57.0  
 Vr47043 R: 5' GTTCTCCCAACATAGACAGC 3' 56.2 90bp  
 Vr22610 F: 5' CAAGAATCTCATCAACAAAAGGG 3' 62.1  
 Vr22610 R: 5' GGGCTAAGGTTTCCATTTTG 3' 60.5 156bp  
 Vr21159 F: 5' ATGCGGAGATTTACTCGCTTCA 3' 61.7  
 Vr21159 R: 5' CCCCCCAAATACTACTCTGC 3' 61.0 132bp  
 Vr39799 F: 5' AAAAGGAAGAGCCCAACAAAG 3' 58.2  
 Vr39799 R: 5' CTGGAGAATAGCGCCTGAAA 3' 58.2 145bp  
 Vr40489 F: 5' GGACCTGCTTCATCTGTACTG 3' 60.5  
 Vr40489 R: 5' TGTTTGTGGTCTCCGTCATCTAA 3' 59.8 164bp  
 Vr31128 F: 5' CCTAGACACGGGTAGTCAAAGAGC 3' 61.6  
 Vr31128 R: 5' TCATCGTTCCAGAGGGCTTG 3' 60.7 102bp
